# Supplementary material
Source: PubMed Central journal article supplement (PMC3659934)
Supplement: supp_2012.080051_2012_080051-Contributions.pdf [file supp_2012.080051_2012_080051-Contributions.pdf]

**Manuscript no. HAEMATOL/2012/080051 entitled "A combination treatment approach and cord blood stem cell transplant for blastic plasmacytoid dendritic cell neoplasm"**

**Authors: Muthalagu Ramanathan, Jan Cerny, Hongbo Yu, Bruce A. Woda, and Rajneesh Nath**

**Information about the contributions of each person named as having participated in the study**

**1) Guarantor(s), i.e., person(s) who is (are) responsible for the integrity of the work as a whole:**

- Muthalagu Ramanathan, University of Massachusetts Medical School and Medical Center, USA, muthalagu.ramanathan@umassmemorial.org

According to the International Committee of Medical Journal Editors (ICMJE)

([http://www.icmje.org/ethical\\_1author.html](http://www.icmje.org/ethical_1author.html)): "Authorship credit should be based on: 1) substantial contributions to conception and design, acquisition of data, or analysis and interpretation of data; 2) drafting the article or revising it critically for important intellectual content; and 3) final approval of the version to be published. Authors should meet conditions 1, 2, and 3 ..... Acquisition of funding, collection of data, or general supervision of the research group alone does not constitute authorship".

**The guarantors of this manuscript confirm that all persons designated as authors qualify for authorship, and that each author has participated sufficiently in the work to take public responsibility for appropriate portions of the content.**

**2) Authors who participated in the conception of the study:**

Muthalagu Ramanathan, Jan Cerny, Hongbo Yu, Bruce A. Woda, and Rajneesh Nath

**3) Design & Methods. The following authors were responsible for specific investigations:**

- Muthalagu Ramanathan, Jan Cerny, and Rajneesh Nath, Department of Hematology and Oncology were responsible for choosing the treatment plan and clinical care of patient
- Hongbo Yu, Bruce A. Woda, Department of Pathology were responsible for the analysis of bone marrow specimen and diagnosis

**4) Results. The following authors were responsible for specific portions of the results, including figures and tables:**

- Muthalagu Ramanathan, Jan Cerny, and Rajneesh Nath were responsible for the clinical part of manuscript
- Hongbo Yu, Bruce A. Woda were responsible for the bone marrow analysis and report part of the manuscript

**5) Writing the manuscript. The following authors were responsible for writing the manuscript:**

- Muthalagu Ramanathan, Jan Cerny, Hongbo Yu, Bruce A. Woda, and Rajneesh Nath were responsible for writing and editing the manuscript

**6) Contributors Listed in Acknowledgments: Bone Marrow Transplant Team that includes among others the staff listed below: BMT Nurse coordinator Cara Gregoire, Pharmacist Jayde Bednarik, Mid level practioners Lindsey Shanahan and Natasha Fortier, Nursing, Medical Assistant, stem cell lab and administrative personnel who provided assistance in the care of this complex patient.**
